# Supplementary material
Source: PubMed Central journal article supplement (PMC4807478)
Supplement: IAI.01390-15_zii999091663so1.pdf [file IAI.01390-15_zii999091663so1.pdf]

# Figure S1

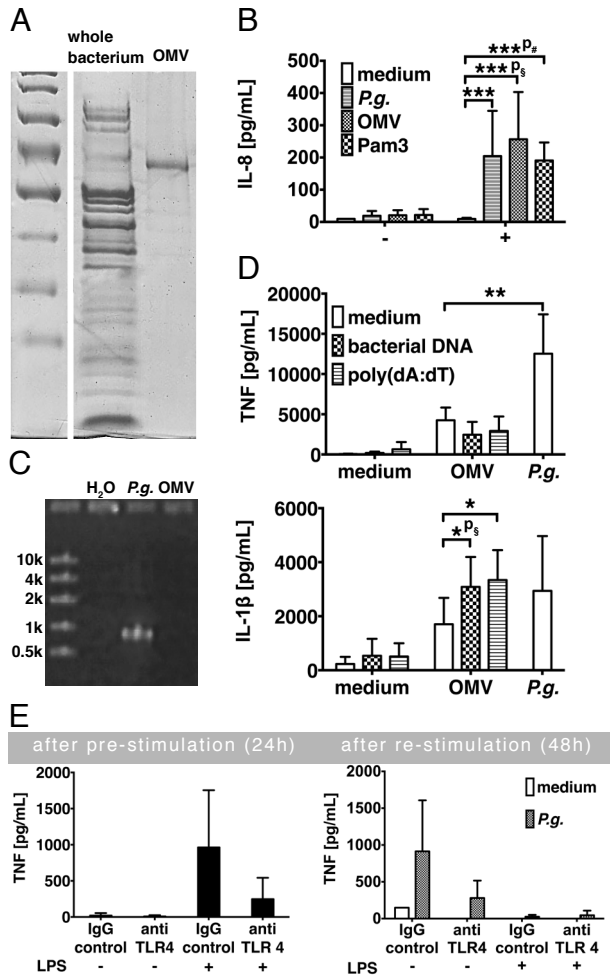

## Figure S1: OMV protein content and TLR2-activity.

(A) The image shows a Coomassie stain to visualize proteins in *P.g.* (ATCC 33277) whole cell lysates and OMV. The blot is representative of  $n=3$  independent experiments. (B) HEK 293 cells were transfected with and without TLR2 plasmid. Subsequent stimulation with *P.g.* (ATCC 33277), OMV and Pam3CSK4 (positive control) for 24 hours. IL-8 was quantified in the supernatants. Data are shown as mean  $\pm$  SD of  $n=4$  donors ( $n=3$  independent experiments). Statistical analysis: unpaired two-tailed Student's *t*-test; \*\*\* $p=0.00088$ ; \*\*\* $p_S=0.00016$ ; \*\*\* $p_Z\leq 0.0001$ . (C) DNA was purified from OMV and *P.g.* (ATCC 33277) cell pellets. 16S rDNA PCR products were loaded on a 2% agarose gel stained with ethidium bromide. The results visualized on the representative gel were obtained  $n=12$  experiments. (D) CD14<sup>+</sup> monocytes isolated were stimulated with combinations of OMV alone, lipofetamine complexed bacterial DNA (purified from TLR2-deficient *S. aureus* mutant SA113DIgt), lipofetamine complexed poly(dA:dT) or live *P.g.* (ATCC 33277). TNF and IL-1 $\beta$  concentrations were measured in the cellular supernatants harvested after 24 hours. The graphs summarize the data from  $n=6$  donors ( $n=3$  independent experiments) as mean values  $\pm$  SD. \* $p=0.0218$ ; \* $p_S=0.0447$ . (E) Human monocytes were pre-stimulated with or without *Salmonella minnesota* LPS; live *P.g.* (ATCC 33277) was used for secondary challenge after washing. The experiments were performed in the presence of neutralizing anti-TLR4 antibody or the isotype control. TNF secretion was measured in the supernatants harvested after 24 (left panel) and 48 h (right panel). The diagrams summarize the data obtained as mean values  $\pm$  SD of  $n=2$  donors ( $n=2$  independent experiments).
